# Supplementary material for: Methane to methanol over copper mordenite: yield improvement through multiple cycles and different synthesis techniques
Source: Royal Society of Chemistry journal article supplement (doi:10.1039/c6cy00041j), 2016-01-01
Supplement: c6cy00041j1.pdf [file c6cy00041j1.pdf]

**Electronic Supporting Information for**  
**Methane to Methanol over Copper Mordenite: Yield Improvement Through Multiple**  
**Cycles and Different Synthesis Techniques**

by

Selmi E. Bozbag<sup>1,2,3</sup>, Evalyn Mae C. Alayon<sup>2,3</sup>, Jan Pecháček<sup>2</sup>, Maarten Nachtegaal<sup>1</sup>,  
Marco Ranocchiari<sup>1</sup>, Jeroen A. van Bokhoven<sup>1,2,\*</sup>

<sup>1</sup>Paul Scherrer Institute, Villigen, CH-5232 Switzerland

<sup>2</sup>ETH Zurich, Wolfgang-Pauli-Strasse 10, CH-8093 Zurich, Switzerland

<sup>3</sup>: Authors contributed equally.

\*: Corresponding author; e-mail: [jeroen.vanbokhoven@chem.ethz.ch](mailto:jeroen.vanbokhoven@chem.ethz.ch); Tel.: + 41 44 632 5542

**Submitted to**

**Catalysis Science & Technology**

## 1. Catalytic Activity

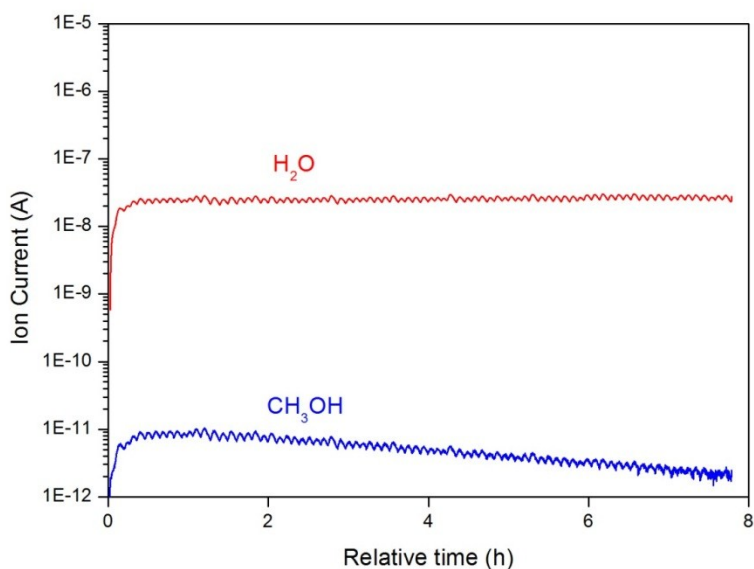

**Figure S1** Mass spectrometer-detected signals of H<sub>2</sub>O ( $m/z = 18$ ), and methanol ( $m/z = 31$ ) during the treatment of wet He at 200 °C after methane interaction of CuMOR<sub>S</sub> during 2<sup>nd</sup> cycle.

## 2. N<sub>2</sub> Adsorption

**Table S1** BET Number of the materials used in this study

| Material                                  | BET surface area<br>[m <sup>2</sup> /g] |
|-------------------------------------------|-----------------------------------------|
| Na-MOR                                    | 411                                     |
| H-MOR                                     | 464                                     |
| CuMOR <sub>A</sub>                        | 386                                     |
| CuMOR <sub>S</sub>                        | 410                                     |
| CuMOR <sub>A</sub> , after 2 cycles of R1 | 328                                     |
| CuMOR <sub>S</sub> , after 8 cycles of R1 | 202                                     |

### 3. XAS spectra taken during in situ synthesis of Cu-MOR<sub>s</sub>

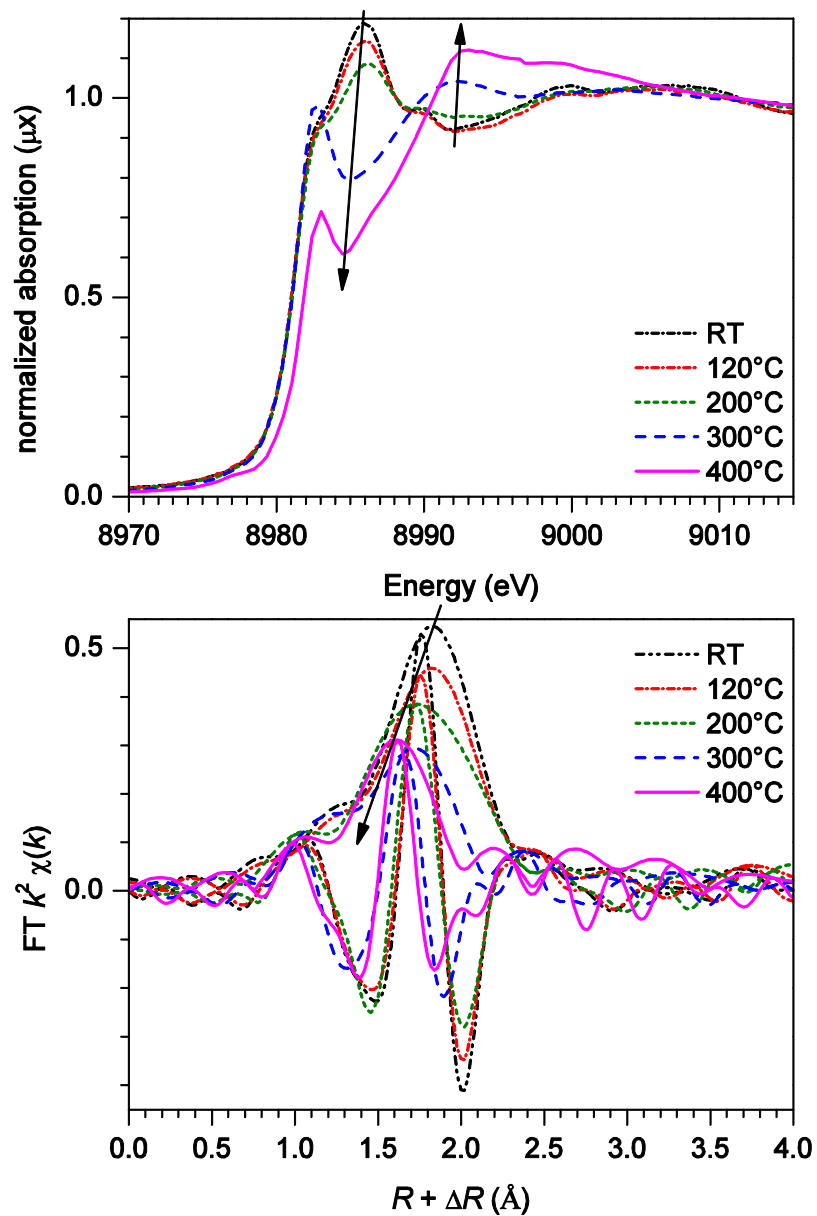

**Figure S2** XANES and FT EXAFS spectra taken during in situ synthesis of Cu-MOR by heating of CuCl and H-MOR

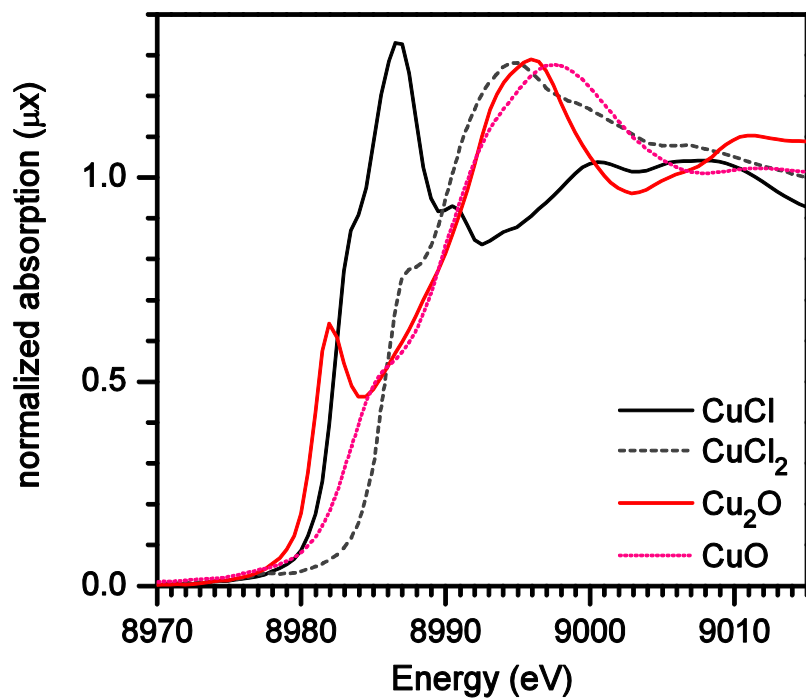

Figure ES3-2. XANES spectra of standard copper compounds

#### 4. Linear Combination Fitting

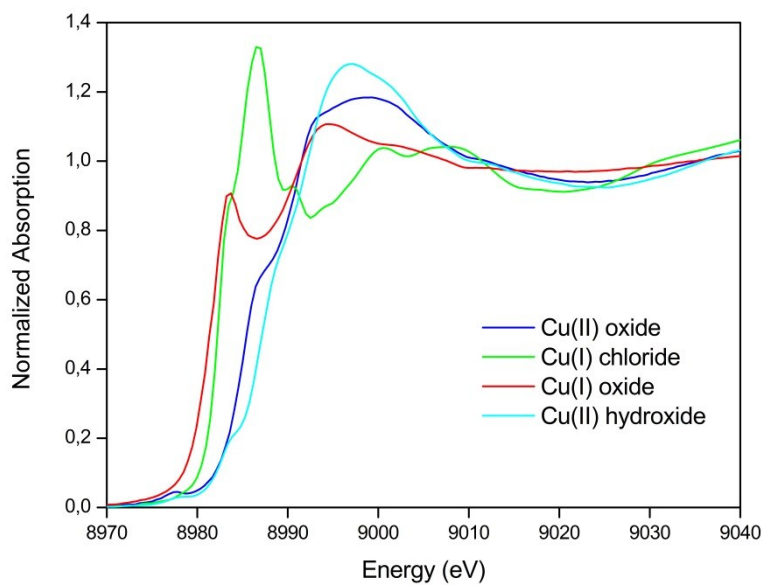

Figure S4 XANES spectra of standard copper compounds used in the LCF.

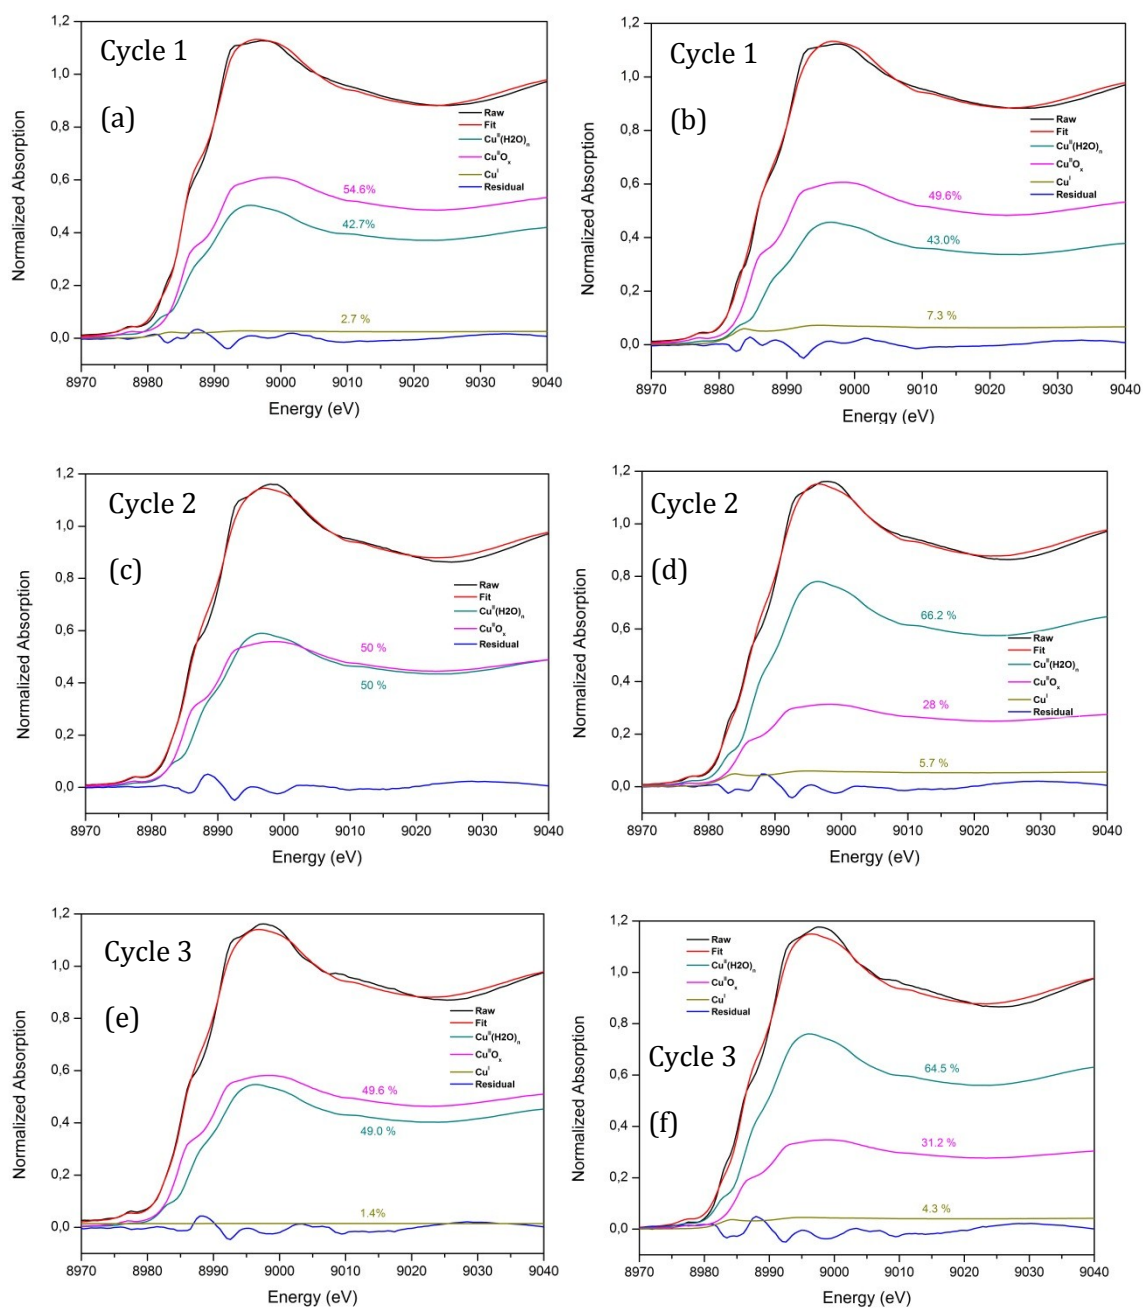

**Figure S5** XANES Spectra taken during O<sub>2</sub> activation (a, c, e) and CH<sub>4</sub> reaction (b, d, f) of Cu-MOR<sub>5</sub> at the corresponding cycle with the linear combination fit, its components and the residual.

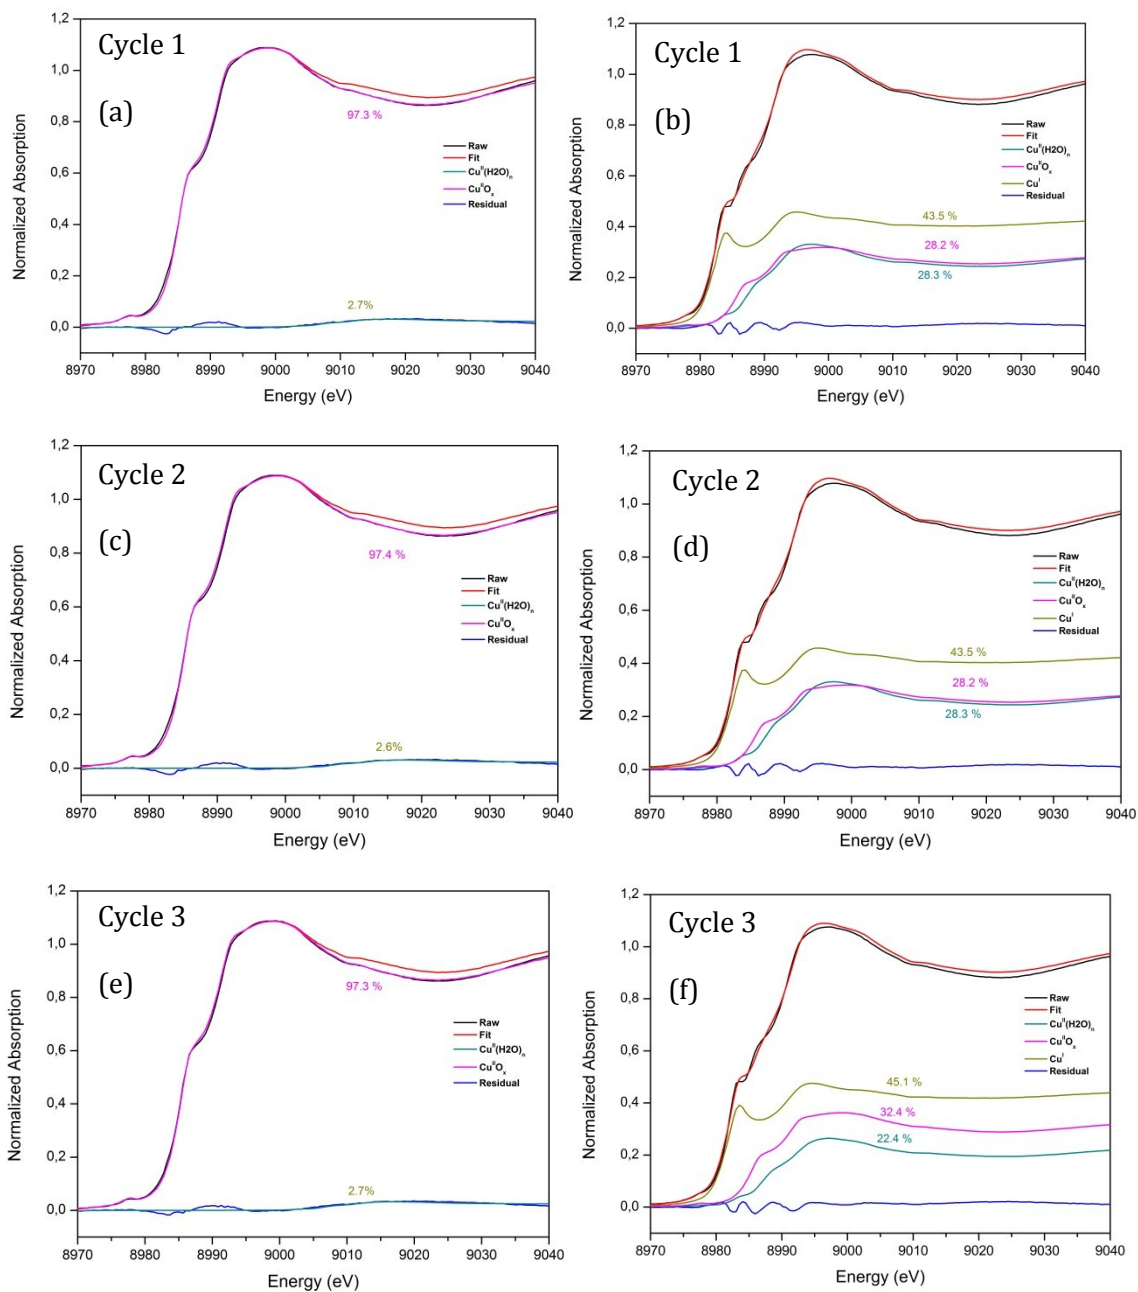

**Figure S6** XANES Spectra taken during O<sub>2</sub> activation (a, c, e) and CH<sub>4</sub> reaction (b, d, f) of Cu-MOR<sub>A</sub> at the corresponding cycle with the linear combination fit, its components and the residual.
